# Supplementary material for: PD-L1-Mediated Immunosuppression in Glioblastoma Is Associated With the Infiltration and M2-Polarization of Tumor-Associated Macrophages
Source: PubMed Central journal article supplement (PMC7734279; doi:10.3389/fimmu.2020.588552), 2020-11-30
Supplement: DataSheet_1.pdf [file DataSheet_1.pdf]

Figure S1.

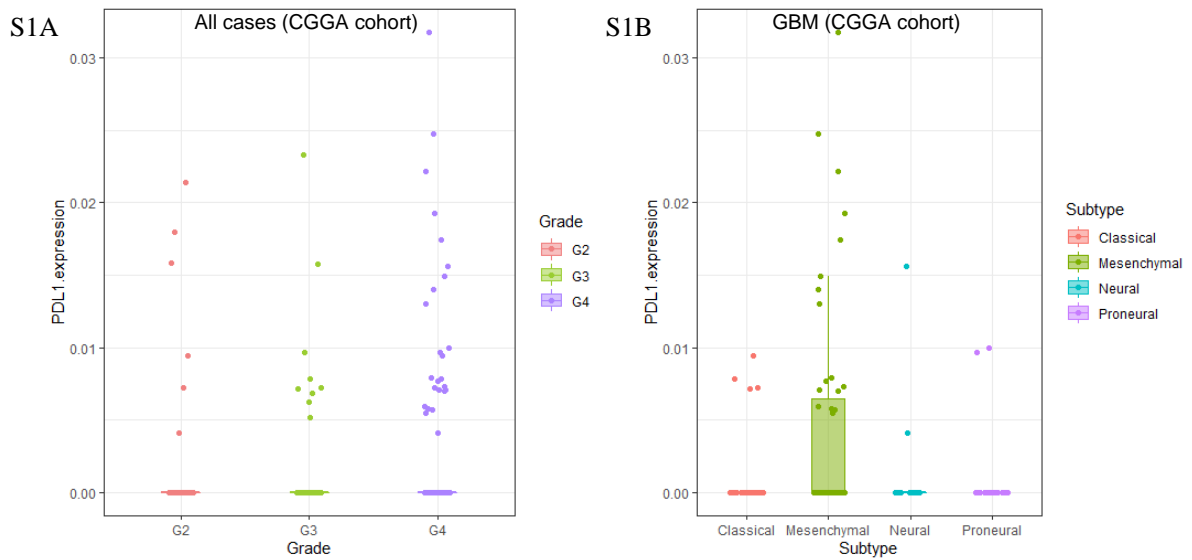

Figure S2.

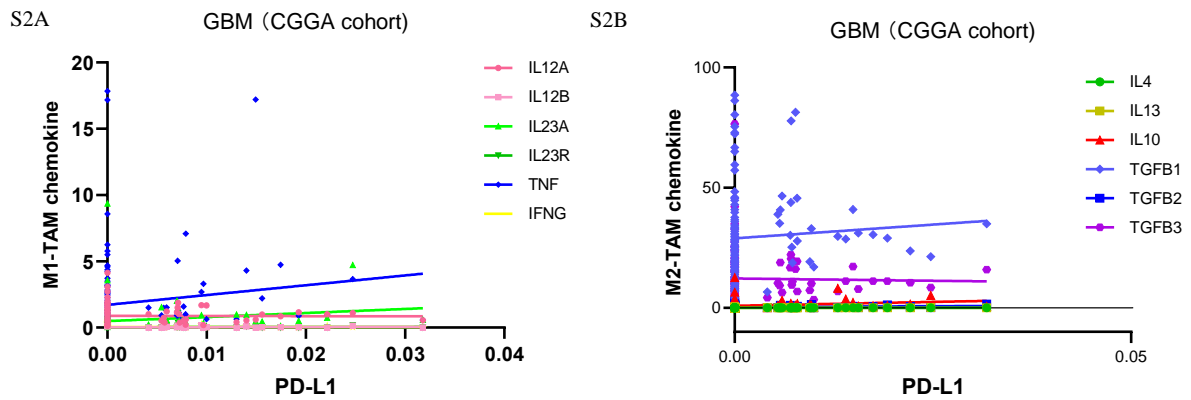

Fig. S1 Expression of PD-L1 in gliomas in CGGA dataset. A. Expression of PD-L1 in each grade of glioma; B. Expression of PD-L1 in GBM subtypes.

Fig S2 Correlation of PD-L1 and TAM-related chemokines in CGGA glioblastoma dataset. A. Chemokine of M1-TAM: IL12A ( $r = -0.0099$ ,  $p > 0.05$ ), IL12B ( $r = 0.212959$ ,  $p < 0.05$ ), IL23A ( $r = 0.174932$ ,  $p < 0.05$ ), IL23R ( $r = 0.042128$ ,  $p > 0.05$ ), TNF ( $r = 0.140619$ ,  $p > 0.05$ ), IFNG ( $r = -0.02935$ ,  $p > 0.05$ ). B. Chemokine of M2-TAM: TGF- $\beta$ 1 ( $r = 0.07003$ ,  $p > 0.05$ ), TGF- $\beta$ 2 ( $r = 0.15186$ ,  $p > 0.05$ ), TGF- $\beta$ 3 ( $r = -0.02224$ ,  $p > 0.05$ ), IL-10 ( $r = 0.22407$ ,  $p = 0.0069$ ), IL-4 ( $r = -0.0394$ ,  $p > 0.05$ ), IL-13 ( $r = -0.05202$ ,  $p > 0.05$ ).
